# Supplementary material for: Salvianolic Acid B Improves Mitochondrial Function in 3T3-L1 Adipocytes Through a Pathway Involving PPARγ Coactivator-1α (PGC-1α)
Source: Front Pharmacol. 2018 Jul 19;9:671. doi: 10.3389/fphar.2018.00671 (PMC6060424; doi:10.3389/fphar.2018.00671)
Supplement: TABLE S3 — Extracellular acidification rates SalB (50 μM) with or without GW9662 (20 μM) in 3T3-L1 adipocytes. [file Table_3.XLSX]

## Sheet: Sheet1
Assay		ECAR
Run Date		11/3/2017 6:31 PM
Instrument ID		420076
Background Correction		On
Y1 Data:	ECAR (mpH/min)			Source:	Group
Time (min)	Background		control		SalB		GW9662		GW9662+SalB
	Value	StandardDeviation	Value	StandardDeviation	Value	StandardDeviation	Value	StandardDeviation	Value	StandardDeviation
1.39408	0	0	34.5437	2.84656	46.4852	4.58858	15.2006	3.48024	24.7376	3.14493
10.0141	0	0	35.52	2.06722	46.1297	4.15292	14.4652	3.92395	24.6904	3.08168
18.6396	0	0	35.9737	1.75127	46.4982	3.82918	14.6519	4.12079	24.8793	3.00995
27.3755	0	0	59.0954	5.13211	77.0697	6.11537	28.8231	11.4724	44.9145	3.98664
35.9976	0	0	58.6568	3.40304	72.719	5.66484	27.1491	10.6657	44.4134	4.65224
44.6239	0	0	58.2582	2.52486	70.2635	5.18711	26.2494	10.2221	43.9199	4.86108
53.3601	0	0	100.632	3.51477	118.977	5.32535	69.7571	11.031	85.0648	4.74744
61.9906	0	0	98.6482	3.22221	116.625	4.29103	67.1706	11.2977	82.5593	4.60885
70.5806	0	0	95.9485	3.20594	113.767	5.97218	64.875	11.452	80.7318	4.82986
79.3209	0	0	27.3637	1.12759	36.1257	3.7397	10.8823	2.55918	22.8302	2.66703
87.9182	0	0	25.674	1.19246	34.1441	4.18169	10.9686	2.87319	22.6381	2.79778
96.5586	0	0	24.9669	1.09095	33.8737	4.28852	10.6645	2.66824	22.373	2.79924
